# Supplementary material
Source: MDPI journal article supplement (https://www.mdpi.com/2073-4395/12/8/1852)
Supplement: s1 [file s1]

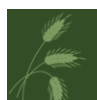

**Table S1.** Host range: response of legume species to isolates of powdery mildew (ns= not studied)

| Host species                            | accession   | Response (DS%) to powdery mildew isolate |                      |                       |                         |                         |
|-----------------------------------------|-------------|------------------------------------------|----------------------|-----------------------|-------------------------|-------------------------|
|                                         |             | <i>E. trifoliorum</i>                    | <i>E. pisi</i>       | <i>E. trifoliorum</i> | <i>Erysiphe</i> sp.     | <i>E. trifoliorum</i>   |
|                                         |             | ex <i>M. truncatula</i>                  | ex <i>P. sativum</i> | ex <i>L. sativus</i>  | ex <i>S. coronarium</i> | ex <i>V. articulata</i> |
| <b>Sulla</b>                            |             |                                          |                      |                       |                         |                         |
| <i>Sulla coronaria</i>                  | Comercial   | 0                                        | 0                    | 0                     | 80                      | 0                       |
| <i>S. coronaria</i>                     | 1/95        | 0                                        | 0                    | 0                     | 20                      | 0                       |
| <i>S. coronaria</i>                     | 2/95        | 0                                        | 0                    | 0                     | 20                      | 0                       |
| <i>S. coronaria</i>                     | 3/95        | 0                                        | 0                    | 0                     | ns                      | 0                       |
| <i>S. coronaria</i>                     | 4/95        | 0                                        | 0                    | 0                     | 10                      | 0                       |
| <b>Pea and related <i>Pisum</i> sp.</b> |             |                                          |                      |                       |                         |                         |
| <i>Pisum sativum</i>                    | P640        | 10                                       | 45                   | 70                    | ns                      | 0                       |
| <i>P. sativum</i>                       | P641        | 10                                       | 60                   | 85                    | 0                       | ns                      |
| <i>P. sativum</i>                       | Messire     | 0.1                                      | 90                   | 30                    | 0                       | 0                       |
| <i>P. sativum</i>                       | Athos       | 0.1                                      | 80                   | 90                    | 0                       | ns                      |
| <i>P. sativum</i>                       | Radley      | 0                                        | ns                   | 40                    | 0                       | ns                      |
| <i>P. fulvum</i>                        | Pf658       | 1                                        | 1                    | 50                    | ns                      | 0                       |
| <i>P. fulvum</i>                        | P660        | 25                                       | 1                    | 50                    | 0                       | 0                       |
| <i>P. elatius</i>                       | P675        | 1                                        | m                    | 80                    | 0                       | 0                       |
| <b>Lentil</b>                           |             |                                          |                      |                       |                         |                         |
| <i>Lens culinaris</i>                   | Lindtn29205 | 0                                        | 0                    | 80                    | 0                       | 60                      |
| <i>L. culinaris</i>                     | 31222       | 0                                        | 0                    | 35                    | 0                       | ns                      |
| <i>L. culinaris</i>                     | 31204       | 0                                        | 0                    | 70                    | 0                       | 60                      |
| <i>L. culinaris</i>                     | 29117       | 0                                        | 0                    | 60                    | 0                       | 60                      |
| <i>L. culinaris</i>                     | 363         | ns                                       | ns                   | ns                    | ns                      | 60                      |
| <b>Common bean and related</b>          |             |                                          |                      |                       |                         |                         |
| <b><i>Phaseolus</i> sp.</b>             |             |                                          |                      |                       |                         |                         |
| <i>Phaseolus vulgaris</i>               | Pv377       | 0                                        | 0                    | 0                     | 0                       | ns                      |
| <i>P. vulgaris</i>                      | Pv379       | 0                                        | 0                    | 0                     | 0                       | ns                      |
| <i>P. vulgaris</i>                      | Pv380       | 0                                        | 0                    | 0                     | 0                       | 0                       |
| <i>P. vulgaris</i>                      | Pv383       | 0                                        | 0                    | 0                     | 0                       | 0                       |
| <i>P. vulgaris</i>                      | Pv387       | 0                                        | ns                   | 0                     | 0                       | ns                      |
| <i>P. filiformis</i>                    | Pfilip-367  | 0                                        | 0                    | 0                     | 0                       | ns                      |
| <i>P. filiformis</i>                    | Pfilip-372  | 0                                        | 0                    | 0                     | 0                       | 0                       |
| <i>P. leptostachyus</i> .               | P.lept-371  | 0                                        | 0                    | 0                     | 0                       | ns                      |
| <i>P. leptostachyus</i>                 | P.lept-366  | 0                                        | 0                    | 0                     | 0                       | 0                       |
| <b>Lucerne and <i>Medicago</i> sp.</b>  |             |                                          |                      |                       |                         |                         |
| <i>Medicago sativa</i>                  | M-611       | 0                                        | 0                    | 0                     | 0                       | ns                      |
| <i>M. sativa</i>                        | M-617       | 0                                        | 0                    | 0                     | 0                       | ns                      |
| <i>M. sativa</i>                        | M-631       | 0                                        | 0                    | 0                     | 0                       | ns                      |
| <i>M. sativa</i>                        | Victoria    | 0                                        | 0                    | 0                     | 0                       | ns                      |
| <i>M. truncatula</i>                    | Parabinga   | 70                                       | ns                   | 20                    | 0                       | ns                      |
| <i>M. polymorpha</i>                    | M-594       | 60                                       | 0.1                  | 1                     | 0                       | ns                      |
| <b><i>Lathyrus</i> sp.</b>              |             |                                          |                      |                       |                         |                         |
| <i>Lathyrus cicera</i>                  | L2          | 0                                        | 1                    | 10                    | 0                       | ns                      |
| <i>L. cicera</i>                        | L88         | 0                                        | 60                   | 50                    | 0                       | ns                      |

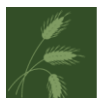

|                    |              |    |    |    |    |    |
|--------------------|--------------|----|----|----|----|----|
| <i>L. cicera</i>   | L105         | ns | ns | 80 | ns | ns |
| <i>L. cicera</i>   | L138         | 0  | 35 | 40 | 0  | ns |
| <i>L. cicera</i>   | L141         | 0  | 20 | 80 | 0  | 0  |
| <i>L. cicera</i>   | L144         | 0  | 25 | 90 | 0  | 0  |
| <i>L. sativus</i>  | L156         | 0  | 25 | 85 | 0  | ns |
| <i>L. sativus</i>  | L177         | 0  | 40 | 80 | 0  | ns |
| <i>L. sativus</i>  | ICARDA-2-6-7 | 0  | 30 | 90 | 0  | 0  |
| <i>L. sativus</i>  | L180         | 0  | 20 | 70 | 0  | ns |
| <i>L. sativus</i>  | L201         | 0  | 10 | ns | 0  | ns |
| <i>L. ochrus</i>   | L313         | 0  | 15 | 95 | 0  | 30 |
| <i>L. ochrus</i>   | L350         | 0  | 1  | 90 | 0  | ns |
| <i>L. ochrus</i>   | L351         | 0  | 7  | 85 | 0  | ns |
| <i>L. clymenum</i> | L357         | 0  | 5  | 60 | 0  | ns |
| <i>L. clymenum</i> | L387         | 0  | 0  | ns | 0  | ns |

#### Chickpea and related

##### Cicer sp.

|                        |          |   |   |   |   |    |
|------------------------|----------|---|---|---|---|----|
| <i>Cicer arietinum</i> | Pringao  | 0 | 0 | 0 | 0 | 0  |
| <i>C. arietinum</i>    | Fardon   | 0 | 0 | 0 | 0 | 0  |
| <i>C. arietinum</i>    | Zoco     | 0 | 0 | 0 | 0 | 0  |
| <i>C. arietinum</i>    | Pedroche | 0 | 0 | 0 | 0 | 0  |
| <i>C. arietinum</i>    | Cavir    | 0 | 0 | 0 | 0 | 0  |
| <i>C. reticulatum</i>  | Cr5-9    | 0 | 0 | 0 | 0 | ns |
| <i>C. reticulatum</i>  | Cr5-10   | 0 | 0 | 0 | 0 | ns |

##### Faba bean

|                   |           |   |   |   |   |    |
|-------------------|-----------|---|---|---|---|----|
| <i>Vicia faba</i> | Don Ramón | 0 | 0 | 0 | 0 | ns |
| <i>V. faba</i>    | Palacio   | 0 | 0 | 0 | 0 | 0  |
| <i>V. faba</i>    | Brocal    | 0 | 0 | 0 | 0 | 0  |
| <i>V. faba</i>    | Baraca    | 0 | 0 | 0 | 0 | 0  |
| <i>V. faba</i>    | Prothabon | 0 | 0 | 0 | 0 | 0  |

##### Vetches

|                      |            |    |    |     |    |     |
|----------------------|------------|----|----|-----|----|-----|
| <i>Vicia villosa</i> | 22         | 0  | ns | 0.1 | 0  | 50  |
| <i>V. sativa</i>     | A02        | 0  | 0  | 0.1 | 0  | 0   |
| <i>V. sativa</i>     | Vereda     | 0  | 0  | 5   | 0  | 0.1 |
| <i>V. sativa</i>     | 4          | 0  | 0  | 1   | 0  | 0   |
| <i>V. sativa</i>     | 34         | 0  | 0  | 1   | 0  | 0   |
| <i>V. sativa</i>     | 127        | 0  | 0  | 0.1 | 0  | 0   |
| <i>V. monantha</i>   | Monantha-1 | 0  | ns | ns  | 0  | 80  |
| <i>V. monantha</i>   | Monantha-2 | ns | 20 | ns  | ns | ns  |
| <i>V. articulata</i> | Algarroba  | 0  | 0  | 30  | 0  | 80  |

##### Fenugreek

|                                  |           |    |   |    |   |    |
|----------------------------------|-----------|----|---|----|---|----|
| <i>Trigonella foenum-graecum</i> | T-9       | 0  | 0 | 0  | 0 | 0  |
| <i>T. foenum-graecum</i>         | T-37      | 30 | 0 | 30 | 0 | 0  |
| <i>T. foenum-graecum</i>         | T-56      | 0  | 0 | 0  | 0 | 0  |
| <i>T. foenum-graecum</i>         | T-80      | 0  | 0 | 25 | 0 | 0  |
| <i>T. foenum-graecum</i>         | T-81      | 30 | 0 | 30 | 0 | 0  |
| <i>T. foenum-graecum</i>         | Comercial | 20 | 0 | 0  | 0 | ns |
